# Supplementary material for: 3D chemical structures allow robust deep learning models for retention time prediction
Source: Royal Society of Chemistry journal article supplement (doi:10.1039/d2dd00021k), 2022-01-01
Supplement: d2dd00021k1.pdf [file d2dd00021k1.pdf]

# Journal Name

## ARTICLE TYPE

Cite this: DOI: 00.0000/xxxxxxxxxx

### Supplementary Materials: 3D chemical structures allows robust deep learning models for retention time prediction

Mark Zaretckii,<sup>a</sup> Inga Bashkirova,<sup>a</sup> Sergey Osipenko,<sup>a</sup> Yury Kostyukevich,<sup>a</sup> Evgeny Nikolaev,<sup>a</sup> and Petr Popov<sup>\*a</sup>

Received Date

Accepted Date

DOI: 00.0000/xxxxxxxxxx

<sup>a</sup> iMolecule, Skolkovo Institute of Science and Technology, Moscow, Russia, 121205

\* corresponding author, E-mail: p.popov@skoltech.ru

Table 1 The MAE and MedAE performance metrics on the METLIN test sets for random and scaffold splits. Metrics are averaged using 4-x fold cross-validation.

| Model | MAE(Random Split)          | MedAE(Random Split)        | MAE(Scaffold Split)        | MedAE(Scaffold Split)      |
|-------|----------------------------|----------------------------|----------------------------|----------------------------|
| DNN   | 54 ± 1 (6.7 ± 0.1%)        | 37 ± 1 (4.7 ± 0.1%)        | 58 ± 1 (7.2 ± 0.1%)        | 41 ± 1 (5.2 ± 0.1%)        |
| GNN   | <b>39 ± 1 (4.8 ± 0.1%)</b> | <b>24 ± 1 (3.0 ± 0.1%)</b> | <b>41 ± 1 (5.0 ± 0.1%)</b> | <b>25 ± 1 (3.2 ± 0.1%)</b> |
| CPORT | 44 ± 2 (5.5 ± 0.4%)        | 26 ± 1 (3.4 ± 0.1%)        | 47 ± 4 (5.9 ± 0.7%)        | 31 ± 3 (4.0 ± 0.5%)        |

Table 2 Grid search for optimal parameters of the CPORT model.

| Conformation | Orientation | Numb. of confs. | $r_{thr}$ (in seconds) | test MAE (seconds) |
|--------------|-------------|-----------------|------------------------|--------------------|
| rdkit        | rotated     | 2               | 15                     | 47.82              |
| rdkit        | oriented    | 1               | 0                      | 48.56              |
| rdkit        | oriented    | 2               | 0                      | 48.64              |
| rdkit        | oriented    | 1               | 45                     | 48.7               |
| rdkit        | rotated     | 1               | 15                     | 48.87              |
| rdkit        | oriented    | 2               | 0                      | 49.0               |
| rdkit        | oriented    | 1               | 0                      | 49.1               |
| rdkit        | oriented    | 1               | 15                     | 49.32              |
| rdkit        | rotated     | 2               | 0                      | 49.34              |
| rdkit        | rotated     | 2               | 0                      | 49.41              |
| rdkit        | rotated     | 2               | 45                     | 49.59              |
| MD           | rotated     | 1               | 0                      | 49.6               |
| MD           | rotated     | 1               | 15                     | 49.66              |
| rdkit        | rotated     | 1               | 0                      | 49.66              |
| rdkit        | rotated     | 1               | 45                     | 49.72              |
| rdkit        | oriented    | 2               | 15                     | 49.96              |
| rdkit        | oriented    | 4               | 0                      | 51.03              |
| MD           | oriented    | 1               | 15                     | 51.26              |
| MD           | oriented    | 1               | 45                     | 51.36              |
| MD           | rotated     | 2               | 15                     | 51.69              |
| rdkit        | oriented    | 2               | 45                     | 51.93              |
| rdkit        | rotated     | 4               | 0                      | 52.07              |
| MD           | rotated     | 1               | 45                     | 52.09              |
| MD           | rotated     | 1               | 0                      | 52.1               |
| MD           | rotated     | 2               | 0                      | 52.2               |
| rdkit        | oriented    | 4               | 0                      | 52.45              |
| MD           | rotated     | 2               | 0                      | 52.48              |
| MD           | oriented    | 2               | 15                     | 52.6               |
| rdkit        | rotated     | 4               | 15                     | 52.63              |
| MD           | oriented    | 2               | 0                      | 53.06              |
| MD           | rotated     | 4               | 15                     | 53.31              |
| MD           | oriented    | 1               | 0                      | 53.48              |
| rdkit        | rotated     | 4               | 0                      | 53.48              |
| MD           | rotated     | 4               | 45                     | 53.61              |
| rdkit        | oriented    | 4               | 45                     | 54.4               |
| MD           | rotated     | 2               | 45                     | 54.44              |
| MD           | rotated     | 4               | 0                      | 54.45              |
| rdkit        | oriented    | 4               | 15                     | 54.48              |
| rdkit        | rotated     | 4               | 45                     | 55.12              |
| MD           | oriented    | 2               | 0                      | 55.74              |
| MD           | rotated     | 4               | 0                      | 55.75              |
| MD           | oriented    | 4               | 0                      | 55.77              |
| MD           | oriented    | 2               | 45                     | 55.8               |
| MD           | oriented    | 4               | 0                      | 56.41              |
| MD           | oriented    | 4               | 15                     | 56.56              |
| MD           | oriented    | 1               | 0                      | 58.36              |
| MD           | oriented    | 4               | 45                     | 59.11              |
| rdkit        | rotated     | 1               | 0                      | 59.47              |

Table 3 Metrics after fine-tuning.

| metrics  | model   | ABC          | Ajs_TesTf    | AjsUoB       | Bade_Publi   | BDD_C18      | BIG_NTIS_RP1 | Cao_HILIC    | HILIC_tip    | RPMMPDA      | SNU_RIKEN_POS | Waters ACQUITY UPLC with Symapt G1 Q-TOF | in-house_c8  | in-house_c18  |
|----------|---------|--------------|--------------|--------------|--------------|--------------|--------------|--------------|--------------|--------------|---------------|------------------------------------------|--------------|---------------|
| MAE      | gnn     | 53.53        | 69.31        | 47.04        | 90.12        | 53.83        | 75.74        | 67.96        | 66.36        | 58.89        | 43.25         | 143.78                                   | 136.09       | 144.17        |
|          | dnn     | 92.54        | 91.83        | 55.92        | 97.02        | 81.86        | 100.12       | 87.95        | 85.52        | 54.77        | 54.6          | 131.19                                   | 138.7        | 152.98        |
|          | cport   | <b>48.87</b> | <b>59.17</b> | <b>40.72</b> | <b>64.88</b> | 50.11        | 78.13        | <b>64.84</b> | <b>55.47</b> | <b>36.55</b> | 41.58         | <b>102.14</b>                            | <b>92.52</b> | <b>102.88</b> |
|          | XGBoost | 51.98        | 69.7         | 41.86        | 79.57        | <b>47.6</b>  | <b>75.59</b> | 74.09        | 64.48        | 41.35        | <b>38.63</b>  | 103.26                                   | 119.16       | 138.22        |
| MAPE     | gnn     | 25.59        | 48.1         | 61.61        | 23.3         | 48.91        | 17.45        | 64.89        | 44.65        | 31.9         | 16.64         | 66.13                                    | 39.44        | 43.22         |
|          | dnn     | 48.88        | 68.72        | 90.07        | 25.34        | 94.82        | 22.32        | 88.36        | 67.3         | 32.35        | 22.89         | 52.2                                     | 53.89        | 58.19         |
|          | cport   | <b>21.99</b> | <b>32.57</b> | 48.58        | <b>16.36</b> | <b>36.72</b> | 17.73        | <b>47.75</b> | <b>31.63</b> | 19.01        | 15.5          | 34.81                                    | <b>22.03</b> | 28.58         |
|          | XGBoost | 32.29        | 46.06        | <b>42.73</b> | 19.49        | 54.15        | <b>16.27</b> | 60.36        | 46.85        | <b>18.68</b> | <b>15.33</b>  | 42.73                                    | 28.62        | 31.21         |
| MedAE    | gnn     | 33.71        | 42.66        | 32.94        | 76.88        | <b>19.29</b> | 53.85        | 37.47        | 49.37        | 39.86        | 36.77         | 133.57                                   | 111.7        | 118.14        |
|          | dnn     | 71.16        | 72.56        | 47.9         | 74.81        | 55.85        | 70.91        | 69.21        | 72.43        | 41.73        | 44.49         | 98.33                                    | 92.17        | 115.85        |
|          | cport   | <b>29.48</b> | <b>27.28</b> | <b>20.49</b> | <b>47.93</b> | 20.13        | <b>46.85</b> | <b>31.13</b> | <b>28.47</b> | <b>24.34</b> | 28.74         | 58.98                                    | <b>63.57</b> | <b>73.66</b>  |
|          | XGBoost | 31.87        | 44.43        | 22.01        | 62.3         | 32.32        | 60.02        | 35.16        | 48.01        | 31.52        | 30.48         | 71.94                                    | 83.75        | 112.13        |
| MedAPE   | gnn     | 14.46        | 23.32        | 35.14        | 14.63        | 16.14        | 11.62        | 40.38        | 22.22        | 12.64        | 13.45         | 36.77                                    | 14.04        | 14.69         |
|          | dnn     | 22.57        | 37.48        | 33.67        | 14.85        | 32.92        | 15.4         | 46.28        | 36.31        | 12.3         | 17.49         | 33.07                                    | 10.96        | 12.98         |
|          | cport   | <b>12.23</b> | <b>15.97</b> | 29.88        | <b>8.93</b>  | <b>13.35</b> | <b>10.21</b> | 28.48        | <b>18.5</b>  | <b>7.41</b>  | <b>10.77</b>  | <b>24.57</b>                             | <b>8.59</b>  | <b>9.02</b>   |
|          | XGBoost | 15.15        | 22.54        | <b>16.33</b> | 12.65        | 26.14        | 12.67        | <b>22.88</b> | 25.24        | 10.57        | 11.14         | <b>24.57</b>                             | 10.47        | 13.34         |
| Spearman | gnn     | 0.94         | 0.8          | 0.87         | 0.85         | 0.88         | <b>0.89</b>  | 0.77         | 0.77         | 0.77         | 0.86          | 0.29                                     | 0.84         | 0.84          |
|          | dnn     | 0.89         | 0.67         | 0.85         | 0.82         | 0.8          | 0.79         | 0.7          | 0.63         | 0.79         | 0.73          | 0.44                                     | 0.85         | 0.84          |
|          | cport   | <b>0.95</b>  | <b>0.81</b>  | 0.91         | <b>0.91</b>  | <b>0.89</b>  | 0.87         | 0.77         | <b>0.8</b>   | <b>0.88</b>  | 0.85          | 0.6                                      | <b>0.93</b>  | <b>0.92</b>   |
|          | XGBoost | 0.94         | 0.78         | <b>0.92</b>  | 0.87         | 0.84         | 0.88         | <b>0.84</b>  | <b>0.8</b>   | 0.84         | <b>0.89</b>   | <b>0.69</b>                              | 0.84         | 0.84          |

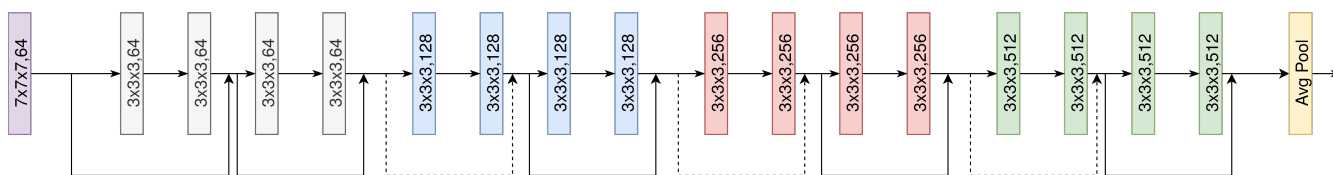

Fig. 1 The 3D convolutional neural network architecture of CPORT.

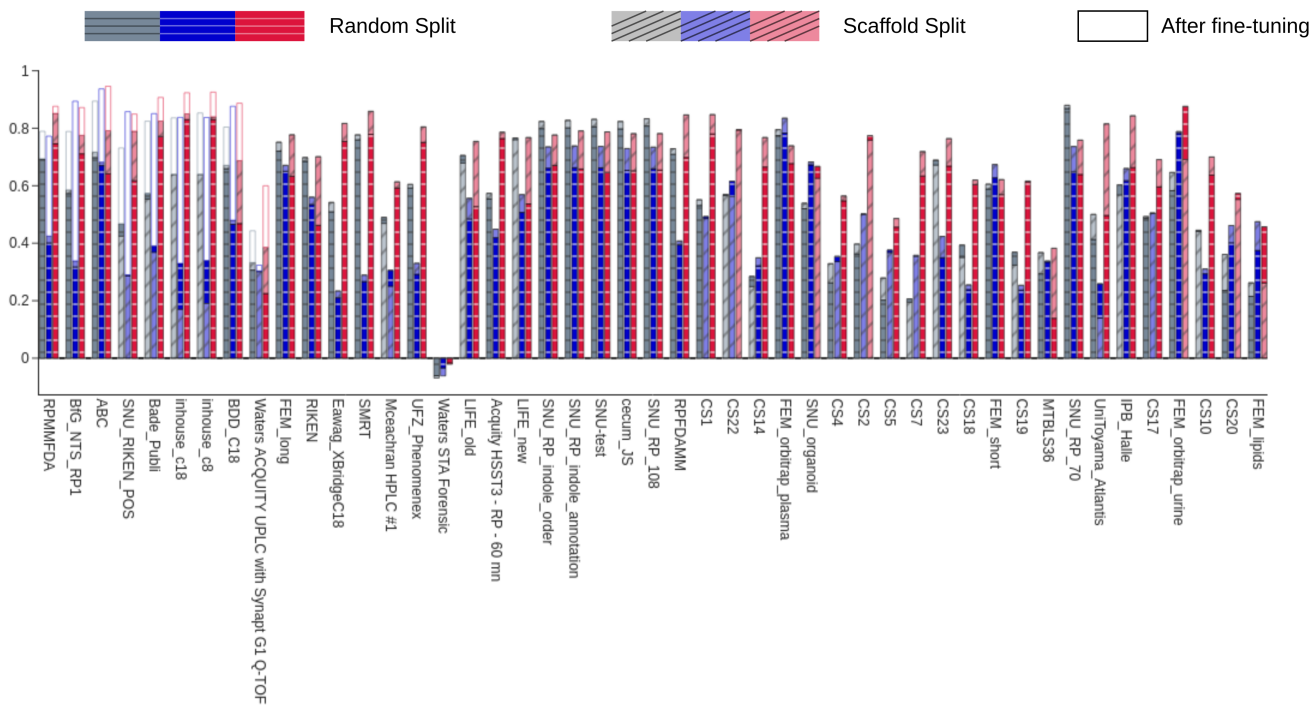

Fig. 2 The Spearman's rank correlations coefficients calculated for each external RPLC dataset. Gray, blue, and red colors correspond to the DNN, GNN, and CPORT models, respectively.

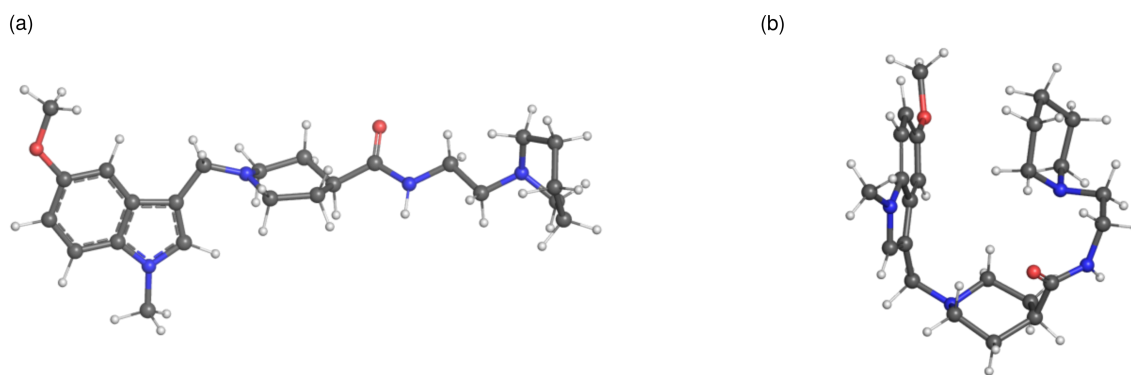

Fig. 3 Conformers of a hydrophobic molecule (a) generated with RDKit, (b) sampled from the molecular dynamics simulations in water.



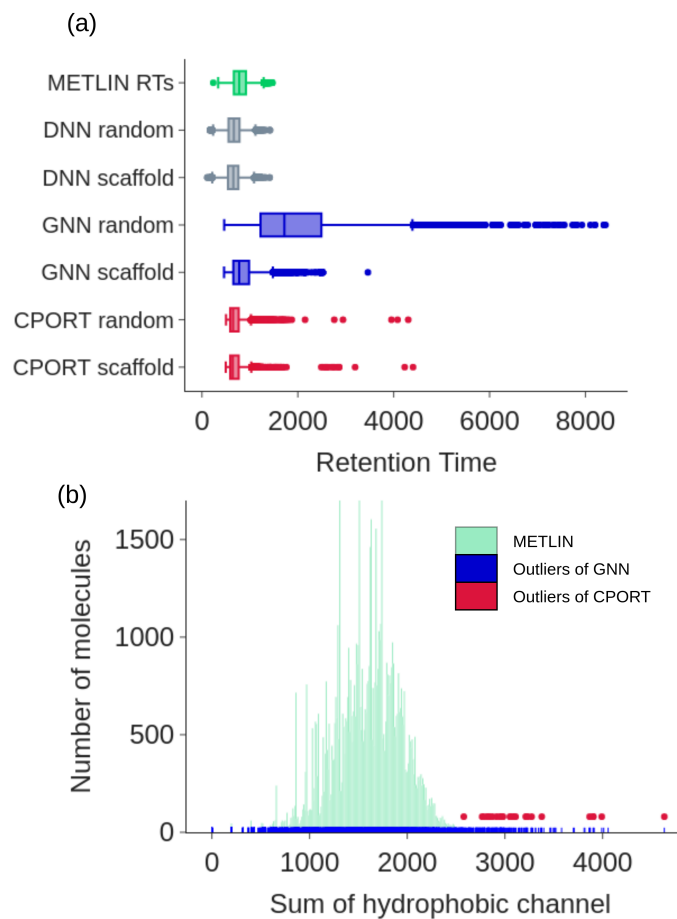

Fig. 4 (a) Predictions of models for the external datasets; (b) Sum of hydrophobicity channel for molecules from METLIN(green) dataset, and for molecules from external datasets for which GNN and CPORT models predict retention times greater than 2000 seconds.

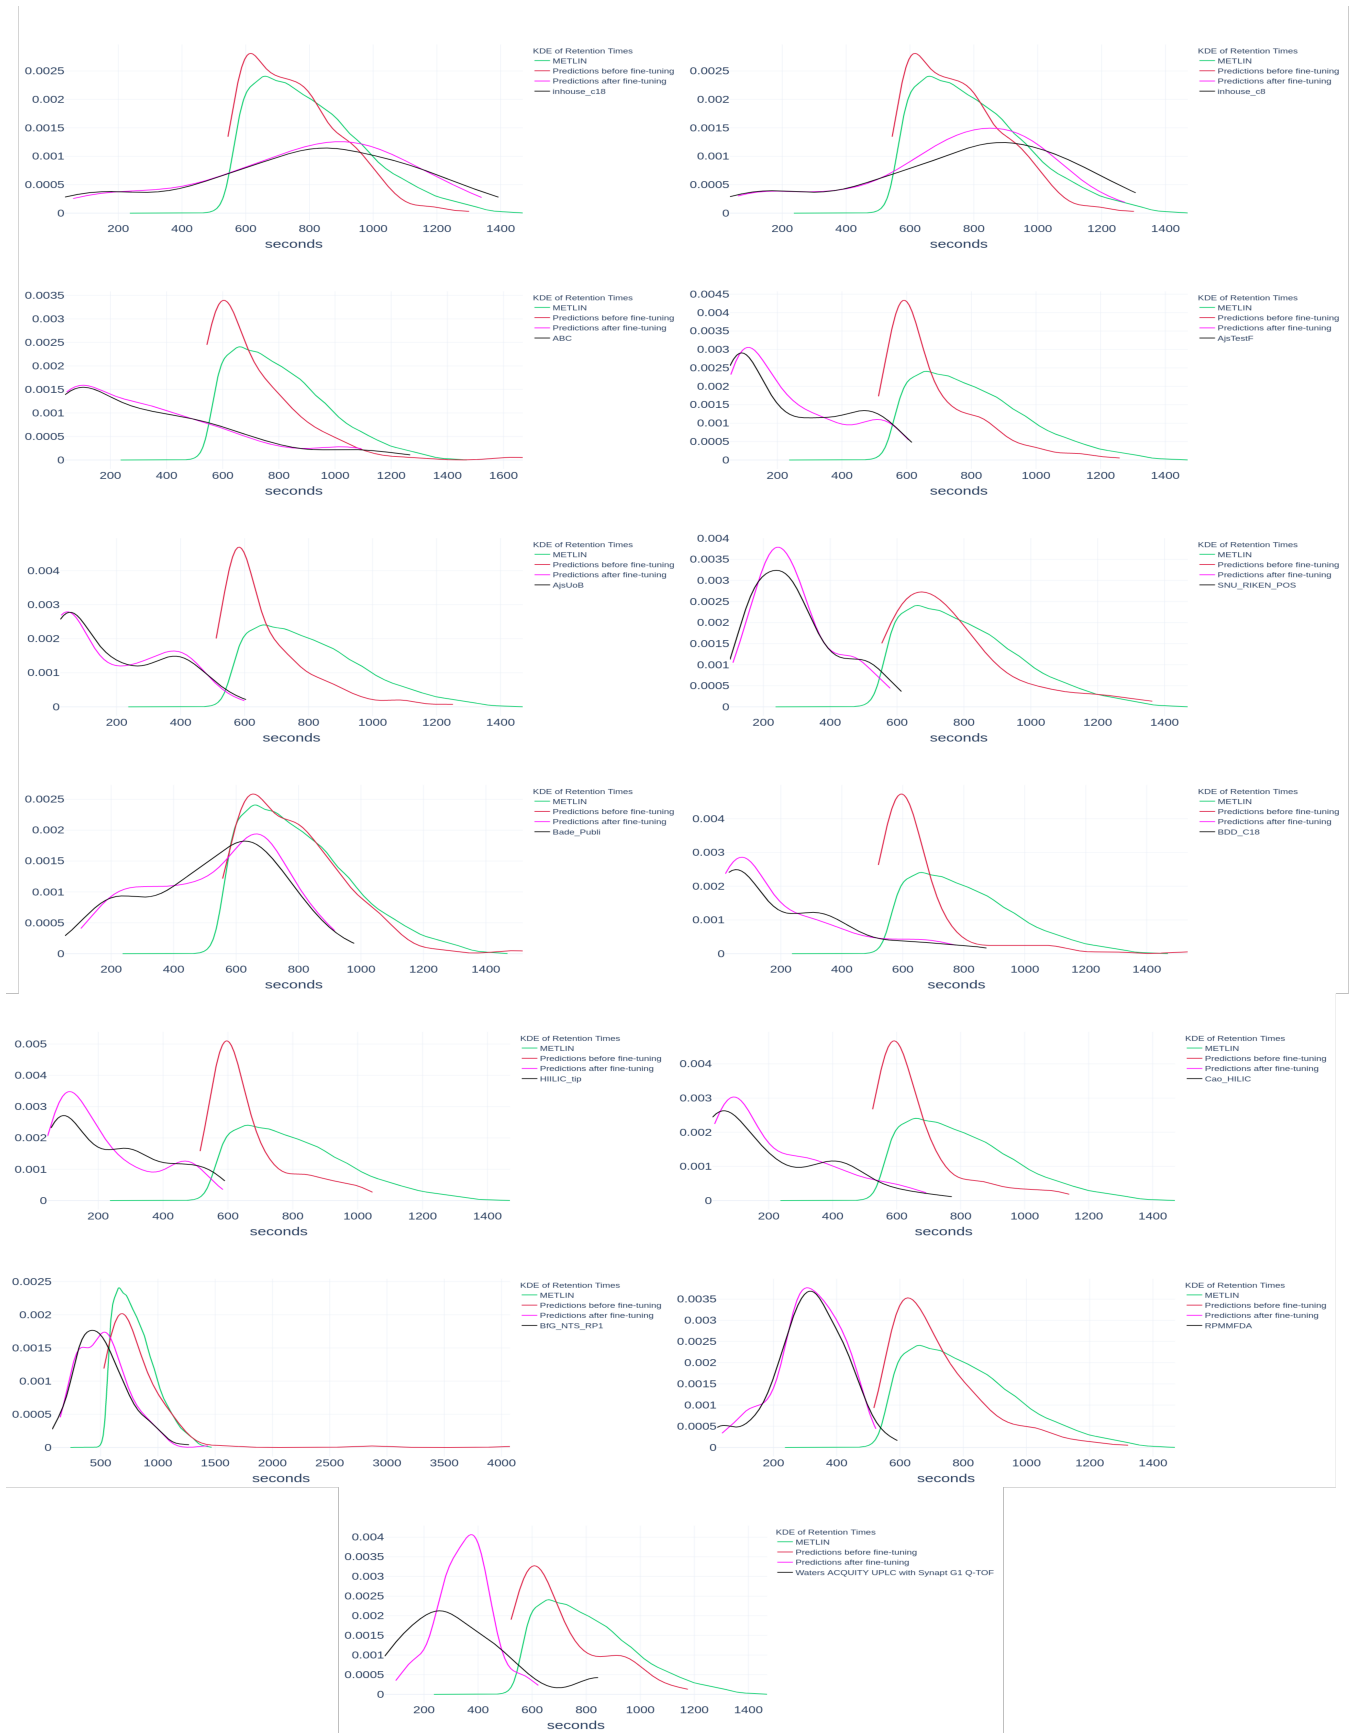

Fig. 5 Kernel density estimations of RT values from METLIN (green), external datasets (black), predictions of the original CPORT (red), and predictions of CPORT after fine-tuning (magenta).

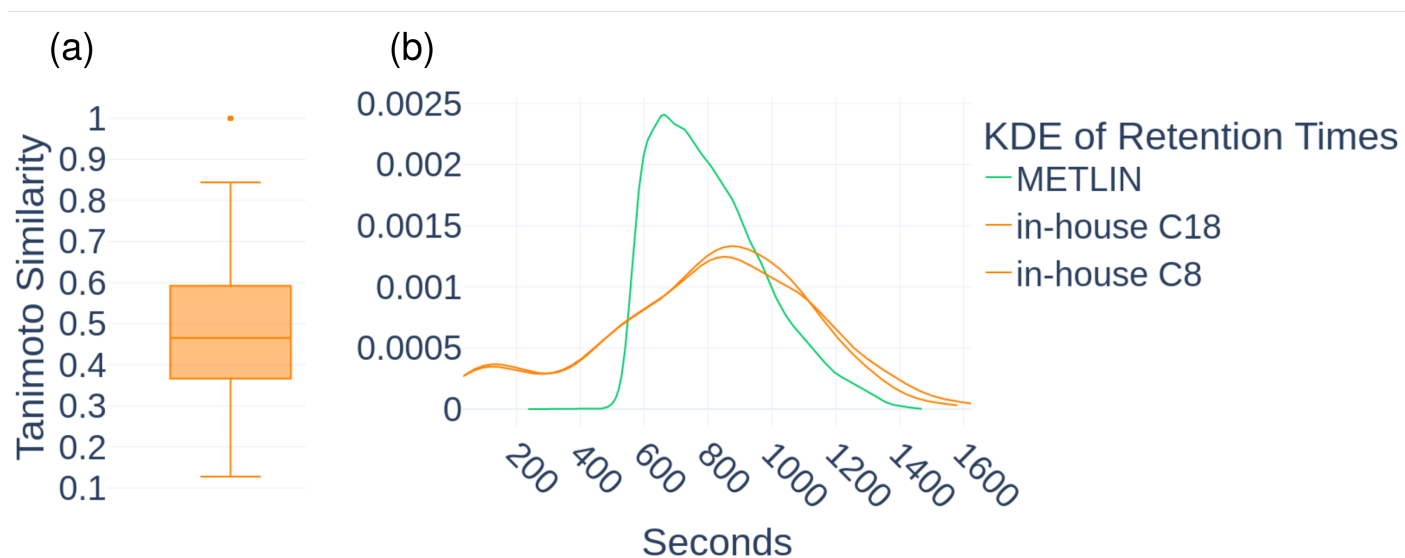

Fig. 6 (a) Boxplot of Tanimoto Similarities between molecules in the in-house and METLIN datasets; (b) Kernel Density Estimation of Retention Times of METLIN and in-house datasets.

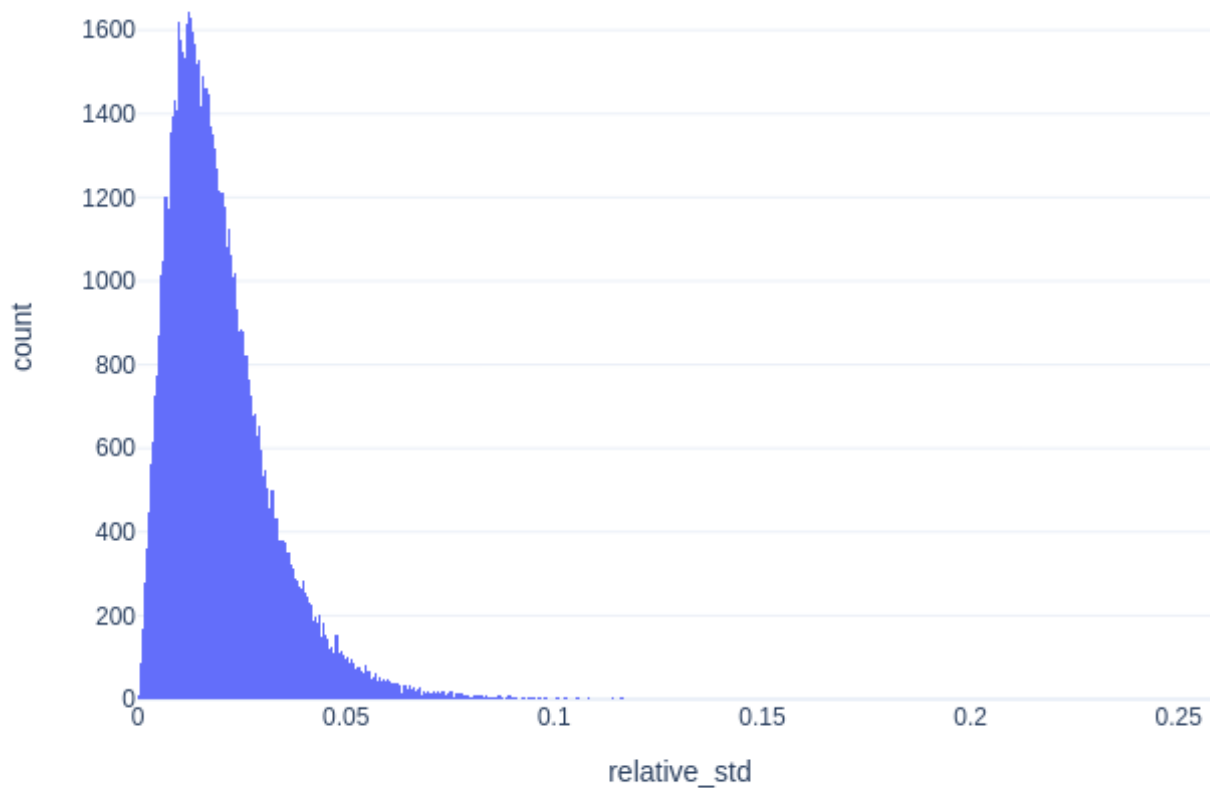

Fig. 7 Histogram of normalized standard deviation from the predictions obtained for four different conformers of each molecule  $m$  in the train and test sets.

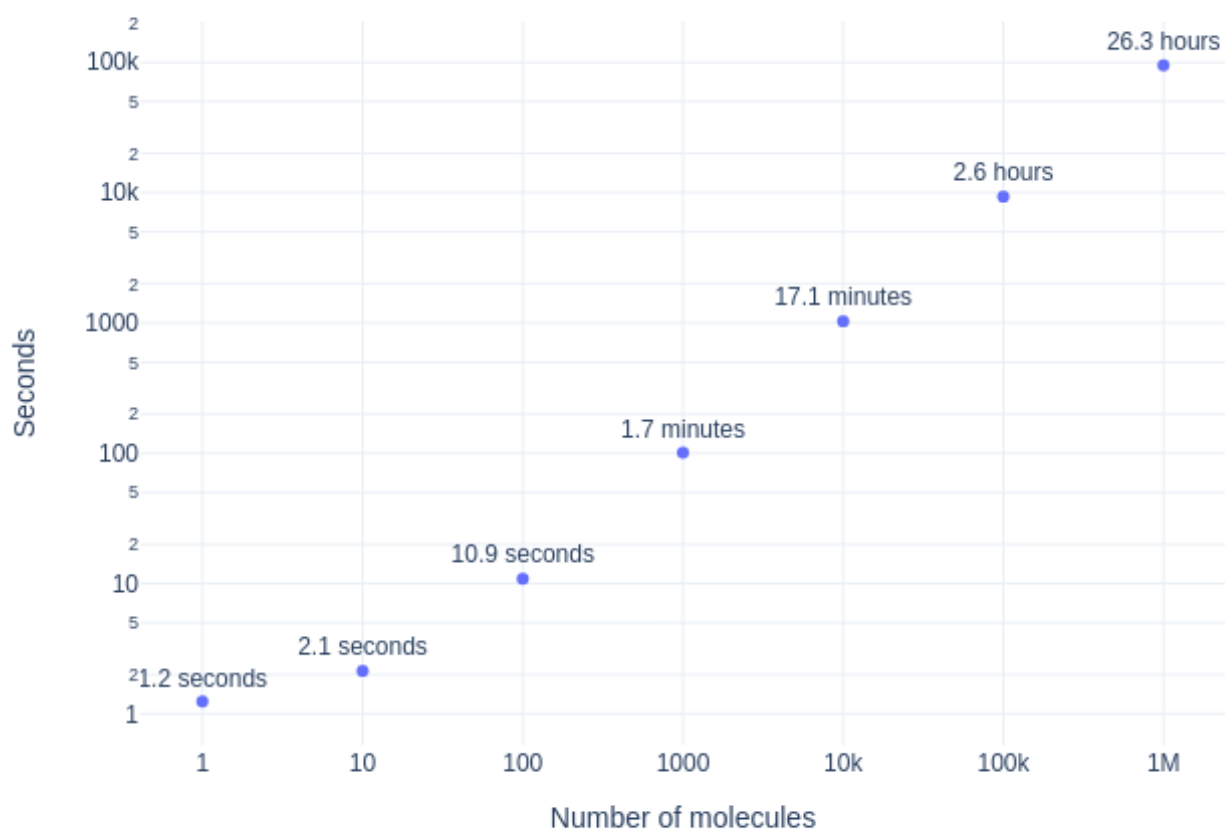

Fig. 8 Hours for processing and scoring 1000 random molecules from the METLIN dataset.

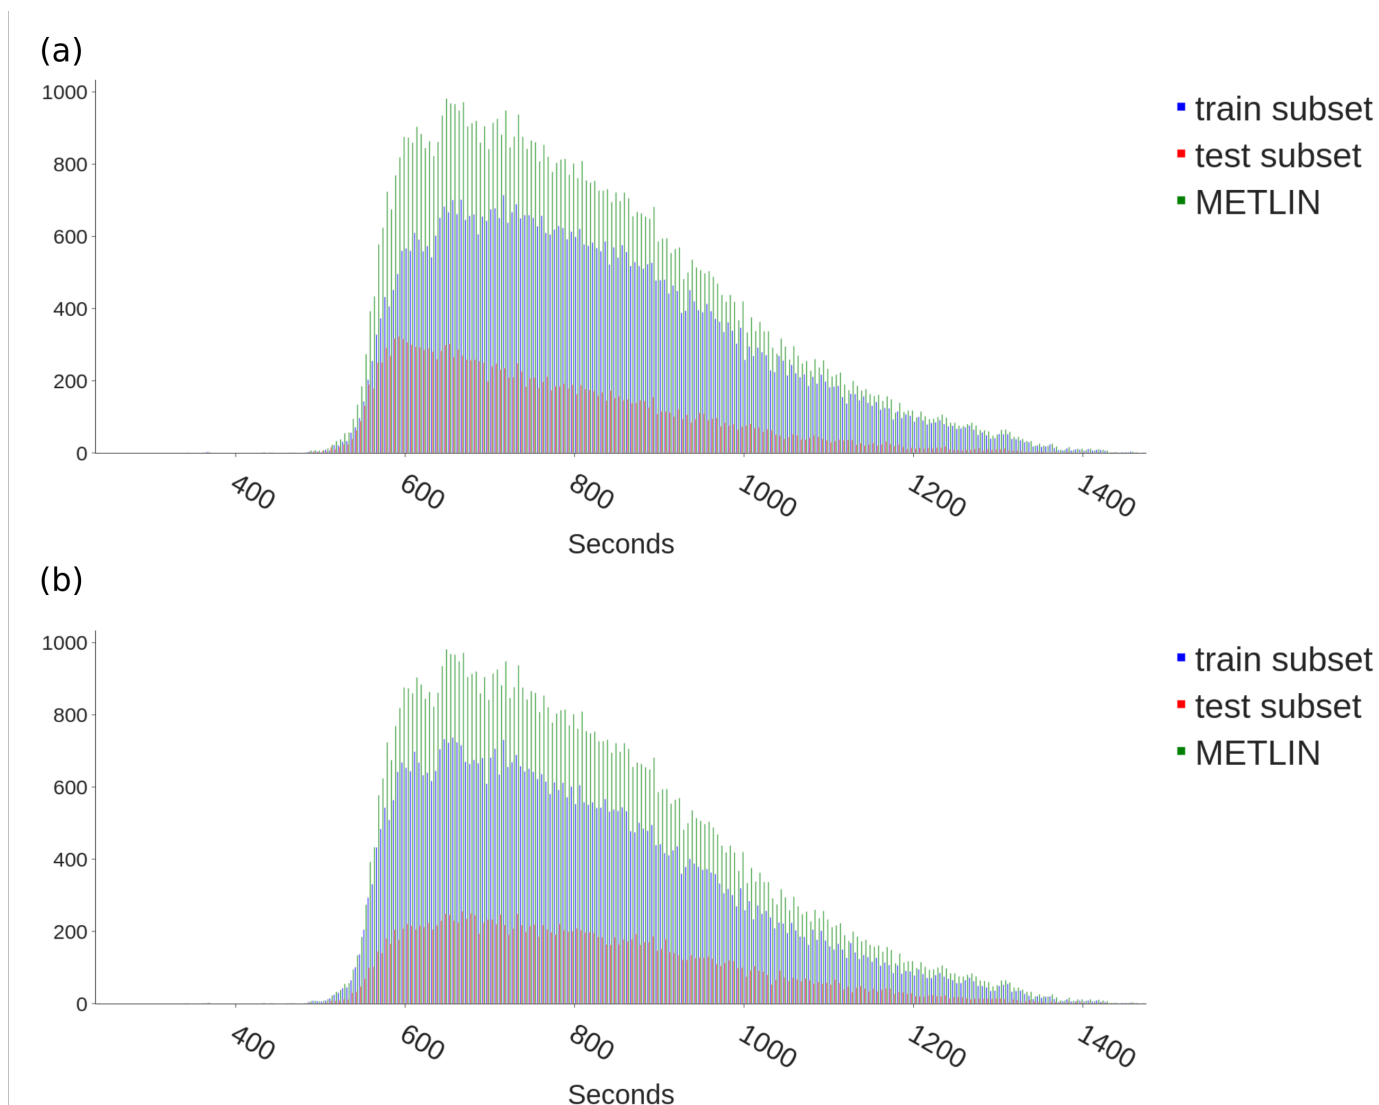

Fig. 9 Distribution of retention times in METLIN dataset and its train and test subsets after scaffold splitting using (a) the DeepChem library and (b) additional shuffling used in this work.

Table 4 Averaged Spearman's correlation rank coefficients on external datasets corresponding to the 4-fold cross-validation models trained using random and scaffold splits.

| Name                                     | cport_random       | gnn_random   | dnn_random          | cport_scaffold      | gnn_scaffold       | dnn_scaffold        | type  |
|------------------------------------------|--------------------|--------------|---------------------|---------------------|--------------------|---------------------|-------|
| FEM_long                                 | 0.63 ± 0.22        | 0.65 ± 0.09  | 0.72 ± 0.03         | <b>0.78 ± 0.17</b>  | 0.67 ± 0.07        | 0.75 ± 0.02         | RPLC  |
| FEM_short                                | 0.57 ± 0.06        | 0.63 ± 0.05  | 0.59 ± 0.05         | 0.62 ± 0.06         | <b>0.67 ± 0.03</b> | 0.61 ± 0.03         | RPLC  |
| IPB_Halle                                | 0.66 ± 0.17        | 0.62 ± 0.04  | 0.6 ± 0.02          | <b>0.84 ± 0.03</b>  | 0.66 ± 0.07        | 0.57 ± 0.03         | RPLC  |
| MTBLS87                                  | 0.03 ± 0.32        | -0.12 ± 0.14 | -0.19 ± 0.06        | -0.21 ± 0.11        | -0.22 ± 0.2        | -0.25 ± 0.03        | HILIC |
| RIKEN                                    | 0.46 ± 0.22        | 0.53 ± 0.08  | 0.68 ± 0.02         | <b>0.7 ± 0.1</b>    | 0.56 ± 0.08        | 0.7 ± 0.02          | RPLC  |
| FEM_orbitrap_plasma                      | 0.68 ± 0.15        | 0.78 ± 0.04  | 0.77 ± 0.06         | 0.74 ± 0.29         | <b>0.83 ± 0.05</b> | 0.8 ± 0.02          | RPLC  |
| FEM_orbitrap_urine                       | <b>0.88 ± 0.07</b> | 0.78 ± 0.03  | 0.58 ± 0.08         | 0.69 ± 0.31         | 0.79 ± 0.08        | 0.65 ± 0.05         | RPLC  |
| MTBLS36                                  | 0.14 ± 0.16        | 0.33 ± 0.1   | 0.29 ± 0.04         | 0.38 ± 0.1          | 0.34 ± 0.09        | 0.37 ± 0.02         | RPLC  |
| UFZ_Phenomenex                           | 0.75 ± 0.08        | 0.29 ± 0.08  | 0.59 ± 0.03         | <b>0.8 ± 0.04</b>   | 0.33 ± 0.06        | 0.6 ± 0.02          | RPLC  |
| UniToyama_Atlantis                       | 0.5 ± 0.58         | 0.26 ± 0.34  | 0.41 ± 0.12         | <b>0.82 ± 0.07</b>  | 0.14 ± 0.15        | 0.5 ± 0.04          | RPLC  |
| Eawag_XBridgeC18                         | 0.75 ± 0.06        | 0.21 ± 0.04  | 0.51 ± 0.03         | <b>0.82 ± 0.04</b>  | 0.23 ± 0.09        | 0.54 ± 0.01         | RPLC  |
| Cao_HILIC                                | -0.42 ± 0.26       | -0.36 ± 0.1  | -0.57 ± 0.04        | <b>-0.69 ± 0.04</b> | -0.41 ± 0.06       | -0.58 ± 0.01        | HILIC |
| Waters ACQUITY UPLC with Synapt G1 Q-TOF | 0.22 ± 0.14        | 0.3 ± 0.08   | 0.31 ± 0.0          | 0.39 ± 0.03         | 0.3 ± 0.04         | 0.33 ± 0.04         | RPLC  |
| KI_GIAR_zic_HILIC_pH2_7                  | -0.31 ± 0.21       | -0.19 ± 0.14 | <b>-0.58 ± 0.01</b> | -0.58 ± 0.06        | -0.28 ± 0.11       | -0.57 ± 0.03        | HILIC |
| CS10                                     | 0.64 ± 0.24        | 0.29 ± 0.12  | 0.44 ± 0.13         | <b>0.7 ± 0.13</b>   | 0.31 ± 0.09        | 0.44 ± 0.11         | RPLC  |
| CS7                                      | 0.63 ± 0.14        | 0.36 ± 0.15  | 0.21 ± 0.1          | <b>0.72 ± 0.05</b>  | 0.35 ± 0.03        | 0.2 ± 0.12          | RPLC  |
| CS23                                     | 0.67 ± 0.09        | 0.35 ± 0.2   | 0.69 ± 0.07         | <b>0.76 ± 0.08</b>  | 0.42 ± 0.1         | 0.67 ± 0.04         | RPLC  |
| HILIC_BDD_2                              | -0.25 ± 0.33       | -0.21 ± 0.07 | -0.45 ± 0.05        | <b>-0.56 ± 0.05</b> | -0.29 ± 0.14       | -0.47 ± 0.03        | HILIC |
| Bade_Publi                               | 0.77 ± 0.05        | 0.39 ± 0.09  | 0.57 ± 0.01         | <b>0.82 ± 0.02</b>  | 0.37 ± 0.03        | 0.55 ± 0.03         | RPLC  |
| Acquity HSST3 - RP - 60 mn               | 0.76 ± 0.01        | 0.42 ± 0.09  | 0.55 ± 0.03         | <b>0.79 ± 0.03</b>  | 0.45 ± 0.03        | 0.57 ± 0.03         | RPLC  |
| CS2                                      | <b>0.77 ± 0.05</b> | 0.5 ± 0.06   | 0.36 ± 0.07         | 0.76 ± 0.1          | 0.5 ± 0.01         | 0.4 ± 0.07          | RPLC  |
| CS1                                      | 0.78 ± 0.18        | 0.49 ± 0.11  | 0.53 ± 0.11         | <b>0.85 ± 0.09</b>  | 0.49 ± 0.04        | 0.55 ± 0.05         | RPLC  |
| CS17                                     | 0.6 ± 0.13         | 0.5 ± 0.15   | 0.49 ± 0.07         | <b>0.69 ± 0.05</b>  | 0.5 ± 0.1          | 0.49 ± 0.08         | RPLC  |
| BDD_C18                                  | 0.47 ± 0.24        | 0.47 ± 0.08  | 0.66 ± 0.02         | <b>0.69 ± 0.1</b>   | 0.48 ± 0.13        | 0.67 ± 0.01         | RPLC  |
| CS20                                     | <b>0.57 ± 0.11</b> | 0.4 ± 0.19   | 0.24 ± 0.11         | 0.55 ± 0.11         | 0.46 ± 0.11        | 0.36 ± 0.2          | RPLC  |
| LIFE_old                                 | 0.53 ± 0.24        | 0.48 ± 0.1   | 0.71 ± 0.03         | <b>0.75 ± 0.04</b>  | 0.56 ± 0.04        | 0.68 ± 0.02         | RPLC  |
| LIFE_new                                 | 0.54 ± 0.27        | 0.51 ± 0.12  | <b>0.77 ± 0.01</b>  | 0.77 ± 0.06         | 0.57 ± 0.08        | 0.76 ± 0.02         | RPLC  |
| CS4                                      | 0.55 ± 0.12        | 0.35 ± 0.12  | 0.26 ± 0.09         | <b>0.56 ± 0.09</b>  | 0.34 ± 0.08        | 0.33 ± 0.12         | RPLC  |
| CS5                                      | 0.46 ± 0.11        | 0.38 ± 0.1   | 0.2 ± 0.13          | 0.49 ± 0.08         | 0.37 ± 0.06        | 0.28 ± 0.15         | RPLC  |
| CS14                                     | 0.67 ± 0.13        | 0.32 ± 0.1   | 0.28 ± 0.1          | <b>0.77 ± 0.05</b>  | 0.35 ± 0.04        | 0.25 ± 0.09         | RPLC  |
| CS18                                     | 0.6 ± 0.17         | 0.24 ± 0.04  | 0.39 ± 0.08         | <b>0.62 ± 0.09</b>  | 0.25 ± 0.0         | 0.35 ± 0.04         | RPLC  |
| CS19                                     | 0.61 ± 0.16        | 0.24 ± 0.04  | 0.37 ± 0.08         | <b>0.62 ± 0.09</b>  | 0.25 ± 0.02        | 0.32 ± 0.04         | RPLC  |
| CS22                                     | <b>0.8 ± 0.07</b>  | 0.62 ± 0.1   | 0.57 ± 0.04         | 0.79 ± 0.08         | 0.56 ± 0.03        | 0.57 ± 0.04         | RPLC  |
| RPFMFDFA                                 | 0.75 ± 0.11        | 0.4 ± 0.07   | 0.69 ± 0.01         | <b>0.85 ± 0.03</b>  | 0.42 ± 0.03        | 0.69 ± 0.0          | RPLC  |
| RPFDAMM                                  | 0.7 ± 0.15         | 0.39 ± 0.08  | 0.71 ± 0.04         | <b>0.85 ± 0.09</b>  | 0.41 ± 0.11        | 0.73 ± 0.02         | RPLC  |
| IJM_TEST                                 | -0.04 ± 0.1        | -0.35 ± 0.05 | -0.25 ± 0.05        | -0.19 ± 0.04        | -0.41 ± 0.04       | -0.23 ± 0.03        | HILIC |
| SMRT                                     | 0.78 ± 0.09        | 0.27 ± 0.08  | 0.76 ± 0.02         | <b>0.86 ± 0.02</b>  | 0.29 ± 0.05        | 0.78 ± 0.01         | RPLC  |
| ABC                                      | 0.64 ± 0.22        | 0.67 ± 0.07  | 0.7 ± 0.03          | <b>0.79 ± 0.11</b>  | 0.68 ± 0.06        | 0.72 ± 0.03         | RPLC  |
| SNU-test                                 | 0.65 ± 0.2         | 0.66 ± 0.08  | 0.8 ± 0.02          | 0.79 ± 0.16         | 0.74 ± 0.06        | <b>0.83 ± 0.01</b>  | RPLC  |
| SNU_RP_70                                | 0.64 ± 0.23        | 0.65 ± 0.11  | 0.87 ± 0.03         | 0.76 ± 0.2          | 0.74 ± 0.08        | <b>0.88 ± 0.01</b>  | RPLC  |
| SNU_RP_108                               | 0.65 ± 0.2         | 0.66 ± 0.08  | 0.81 ± 0.02         | 0.78 ± 0.16         | 0.73 ± 0.06        | <b>0.83 ± 0.01</b>  | RPLC  |
| HILIC_tip                                | -0.41 ± 0.2        | -0.32 ± 0.09 | -0.52 ± 0.02        | <b>-0.62 ± 0.02</b> | -0.4 ± 0.02        | -0.52 ± 0.03        | HILIC |
| SNU_RIKEN_POS                            | 0.62 ± 0.22        | 0.29 ± 0.16  | 0.47 ± 0.06         | <b>0.79 ± 0.02</b>  | 0.29 ± 0.05        | 0.42 ± 0.05         | RPLC  |
| cecum_JS                                 | 0.65 ± 0.2         | 0.65 ± 0.09  | 0.8 ± 0.02          | 0.78 ± 0.16         | 0.73 ± 0.06        | <b>0.82 ± 0.01</b>  | RPLC  |
| SNU_RP_indole_annotation                 | 0.66 ± 0.2         | 0.66 ± 0.08  | 0.8 ± 0.02          | 0.79 ± 0.15         | 0.74 ± 0.06        | <b>0.83 ± 0.01</b>  | RPLC  |
| SNU_RP_indole_order                      | 0.67 ± 0.2         | 0.66 ± 0.08  | 0.8 ± 0.02          | 0.78 ± 0.17         | 0.74 ± 0.06        | <b>0.82 ± 0.01</b>  | RPLC  |
| SNU_organoid                             | 0.67 ± 0.13        | 0.67 ± 0.03  | 0.52 ± 0.03         | 0.63 ± 0.22         | <b>0.68 ± 0.04</b> | 0.54 ± 0.02         | RPLC  |
| Meister zic-pHILIC pH9.3                 | -0.18 ± 0.16       | -0.3 ± 0.15  | -0.51 ± 0.01        | -0.49 ± 0.05        | -0.41 ± 0.04       | <b>-0.53 ± 0.01</b> | HILIC |
| AjsUoB                                   | -0.4 ± 0.29        | -0.38 ± 0.11 | -0.6 ± 0.03         | <b>-0.7 ± 0.04</b>  | -0.44 ± 0.06       | -0.61 ± 0.01        | HILIC |
| AjsTestF                                 | -0.39 ± 0.21       | -0.32 ± 0.1  | -0.53 ± 0.02        | <b>-0.63 ± 0.01</b> | -0.41 ± 0.02       | -0.52 ± 0.03        | HILIC |
| Waters STA Forensic                      | -0.02 ± 0.02       | -0.03 ± 0.05 | -0.06 ± 0.04        | -0.02 ± 0.01        | -0.06 ± 0.05       | -0.07 ± 0.02        | RPLC  |
| BfG_NTS_RP1                              | 0.71 ± 0.08        | 0.32 ± 0.05  | 0.57 ± 0.02         | <b>0.78 ± 0.05</b>  | 0.34 ± 0.04        | 0.59 ± 0.01         | RPLC  |
| Mceachran HPLC 1                         | 0.59 ± 0.02        | 0.31 ± 0.07  | 0.49 ± 0.03         | <b>0.61 ± 0.02</b>  | 0.25 ± 0.05        | 0.47 ± 0.03         | RPLC  |
| FEM_lipids                               | 0.46 ± 0.31        | 0.37 ± 0.13  | 0.22 ± 0.15         | 0.26 ± 0.61         | 0.47 ± 0.12        | 0.26 ± 0.09         | RPLC  |
| in-house_c8                              | 0.83 ± 0.03        | 0.34 ± 0.03  | 0.64 ± 0.02         | <b>0.84 ± 0.03</b>  | 0.19 ± 0.09        | 0.64 ± 0.01         | RPLC  |
| in-house_c18                             | 0.83 ± 0.02        | 0.33 ± 0.03  | 0.64 ± 0.02         | <b>0.85 ± 0.02</b>  | 0.17 ± 0.09        | 0.64 ± 0.01         | RPLC  |

Table 5 Ablation studies

| Name                               | MAE(MAPE)   | MedAE(MedAPE) |
|------------------------------------|-------------|---------------|
| Full model                         | 44 (5.5 %)  | 26 (3.4 %)    |
| without hydrophobicity channel     | +11 (1.5 %) | +12 (1.5 %)   |
| without aromaticity channel        | +25 (3.3 %) | +27 (3.3 %)   |
| without h-bond donor channel       | +16 (2.0 %) | +16 (2.1 %)   |
| without h-bond acceptor channel    | +26 (2.7 %) | +25 (3.3 %)   |
| without positive ionizable channel | +1 (0.1 %)  | +3 (0.3 %)    |
| without negative ionizable channel | +11 (1.6 %) | +11 (1.5 %)   |
| without occupancy channel          | +9 (1.1 %)  | +10 (1.3 %)   |

Table 6 RDKit Descriptors

| MaxEStateIndex   | MinEStateIndex   | MaxAbsEStateIndex   | MinAbsEStateIndex   | qed              | MolWt            | HeavyAtomMolWt   | ExactMolWt  | NumValenceElectrons | NumRadicalElectrons     |
|------------------|------------------|---------------------|---------------------|------------------|------------------|------------------|-------------|---------------------|-------------------------|
| MaxPartialCharge | MinPartialCharge | MaxAbsPartialCharge | MinAbsPartialCharge | FpDensityMorgan1 | FpDensityMorgan2 | FpDensityMorgan3 | BalabanJ    | BertzCT             | Chi0                    |
| Chi0n            | Chi0v            | Chi1                | Chi1n               | Chi1v            | Chi2n            | Chi2v            | Chi3n       | Chi3v               | Chi4n                   |
| Chi4v            | HallKierAlpha    | Ipc                 | Kappa1              | Kappa2           | Kappa3           | LabuteASA        | PEOE_VSA1   | PEOE_VSA10          | PEOE_VSA11              |
| PEOE_VSA12       | PEOE_VSA13       | PEOE_VSA14          | PEOE_VSA2           | PEOE_VSA3        | PEOE_VSA4        | PEOE_VSA5        | PEOE_VSA6   | PEOE_VSA7           | PEOE_VSA8               |
| PEOE_VSA9        | SMR_VSA1         | SMR_VSA10           | SMR_VSA2            | SMR_VSA3         | SMR_VSA4         | SMR_VSA5         | SMR_VSA6    | SMR_VSA7            | SMR_VSA8                |
| SMR_VSA9         | SlogP_VSA1       | SlogP_VSA10         | SlogP_VSA11         | SlogP_VSA12      | SlogP_VSA2       | SlogP_VSA3       | SlogP_VSA4  | SlogP_VSA5          | SlogP_VSA6              |
| SlogP_VSA7       | SlogP_VSA8       | SlogP_VSA9          | TPSA                | EState_VSA1      | EState_VSA10     | EState_VSA11     | EState_VSA2 | EState_VSA3         | EState_VSA4             |
| EState_VSA5      | EState_VSA6      | EState_VSA7         | EState_VSA8         | EState_VSA9      | VSA_EState1      | VSA_EState10     | VSA_EState2 | VSA_EState3         | VSA_EState4             |
| VSA_EState5      | VSA_EState6      | VSA_EState7         | VSA_EState8         | VSA_EState9      | FractionCSP3     | HeavyAtomCount   | NHOHCount   | NOCCount            | NumAliphaticCarbocycles |

Table 7 Grid parameters for XGBoost

| parameter       | values                    |
|-----------------|---------------------------|
| learning_rate   | [0.1, 0.01, 0.05]         |
| max_depth       | [2, 4, 6, 8]              |
| n_estimators    | [50, 100, 200]            |
| num_boost_round | [50, 100, 200, 500, 1000] |
